# Supplementary material
Source: PubMed Central journal article supplement (PMC8259900)
Supplement: NIHMS1709249-supplement-Supplementary_Data.pdf [file NIHMS1709249-supplement-Supplementary_Data.pdf]

## Supplementary Materials for

### ACTRIIA-Fc rebalances activin/GDF versus BMP signaling in pulmonary hypertension

Lai-Ming Yung, Peiran Yang, Sachindra Joshi, Zachary M. Augur, Stephanie S. J. Kim, Geoffrey A. Bocobo, Teresa Dinter, Luca Troncone, Po-Sheng Chen, Megan E. McNeil, Mark Southwood, Sergio Poli de Frias, John Knopf, Ivan O. Rosas, Dianne Sako, R. Scott Pearsall, John D. Quisel, Gang Li, Ravindra Kumar, Paul B. Yu\*

\*Corresponding author. Email: pbyu@bwh.harvard.edu

Published 13 May 2020, *Sci. Transl. Med.* **12**, eaaz5660 (2019)  
DOI: 10.1126/scitranslmed.aaz5660

#### The PDF file includes:

- Fig. S1. Specificity of immunohistochemistry for activin A, GDF 8, and GDF 11 in human and rat lung tissue.
- Fig. S2. Circulating activin A is elevated in WHO Group 1 PAH.
- Fig. S3. ACTRIIA-Fc modulates GDF8-, GDF11-, activin A-, and activin B-mediated signaling in microvascular endothelial and PSMCs isolated from PH donors.
- Fig. S4. ACTRIIA-Fc enhances BMP9-induced signaling and blocks inhibition of BMP9 signaling by GDF11 in multiple endothelial cell lineages.
- Fig. S5. Differential basal and ligand-modulated apoptosis in PMVECs isolated from healthy and PH donors.
- Fig. S6. No significant impact of ACTRIIA-Fc or its ligands on endothelial tube formation in PMVECs from control and PAH donors.
- Fig. S7. Impact of ACTRIIA-Fc on ligand-mediated SMAD signaling in control and PAH-derived PSMCs.
- Fig. S8. Modulation of smooth muscle phenotypic genes by BMP, GDF, activin, and TGF $\beta$  ligands in human PSMCs.
- Fig. S9. Impact of ACTRIIA-Fc on proliferation and apoptosis in PSMCs isolated from both control and PH donors.
- Fig. S10. Impact of ACTRIIA-Fc on cell migration in cultured PSMCs from healthy and PH donors.
- Fig. S11. Treatment with ACTRIIA-Fc or sildenafil does not alter systemic arterial blood pressure in MCT-treated rats.
- Fig. S12. Effects of ACTRIIA-Fc on cell proliferation and signaling in experimental PH.
- Fig. S13. Treatment with ACTRIIA-Fc or sildenafil does not alter systemic arterial blood pressure in the SU-Hx rat model.
- Fig. S14. Western blot analysis of SMAD signaling in the SU-Hx rescue model.

Fig. S15. Treatment with ACTRIIA-Fc improves echocardiographic measures of RV function and PH after SU-Hx exposure.

Fig. S16. ACTRIIA-Fc increases apoptosis in small vessels of severe obliterative PH.

Fig. S17. ACTRIIA-Fc normalized *p*-SMAD2/3 expression in the severe obliterative SU-Hx rat model.

Fig. S18. ACTRIIA-Fc attenuated expression of Pai-1 (*Serpine1*), activin A (*Inhba*), E-selectin (*Sele*), and P-selectin (*Selp*) mRNA in the severe obliterative SU-Hx rat model.

Fig. S19. Treatment of rats with ACTRIIA-Fc in the severe obliterative SU-Hx model did not affect red cell mass.

Table S1. Donor characteristics of serum samples used in the present study.

Table S2. Total number of rats and mice included in the present study.

Table S3. Antibodies used in the present study.

Table S4. Sequences of primers used in the present study.

Table S5. Donor characteristics of primary tissues used in the study.

**Other Supplementary Material for this manuscript includes the following:**

(available at [stm.sciencemag.org/cgi/content/full/12/543/eaaz5660/DC1](http://stm.sciencemag.org/cgi/content/full/12/543/eaaz5660/DC1))

Data file S1 (Microsoft Excel format). Raw data for main figures.

Data file S2 (Microsoft Excel format). Raw data for supplementary figures.

## A 2° Ab only

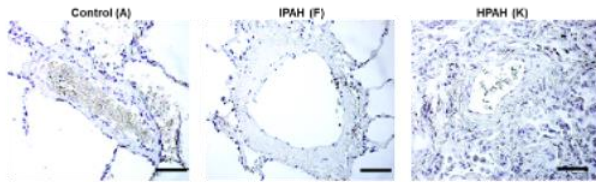

## activin A

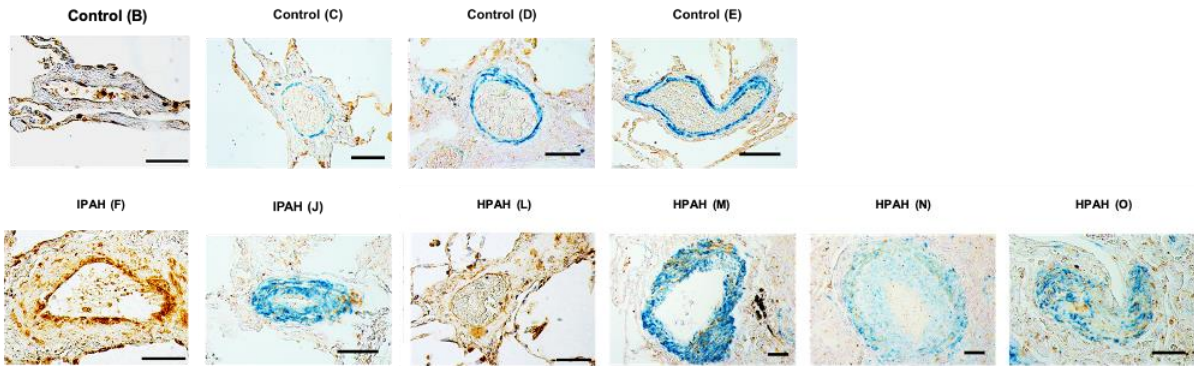

## GDF8

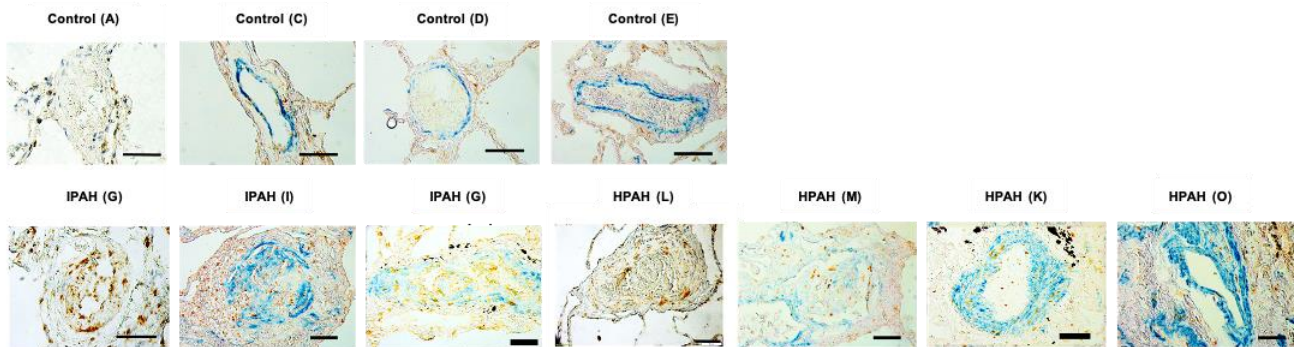

## GDF11

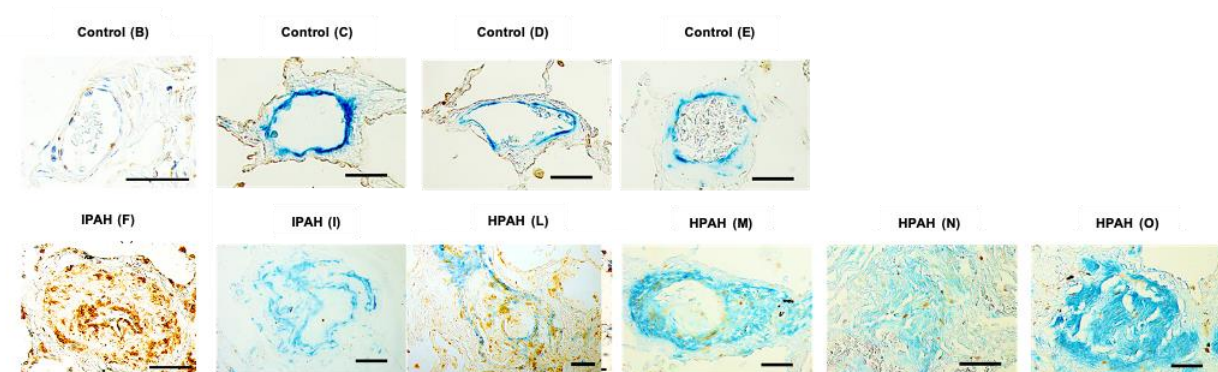

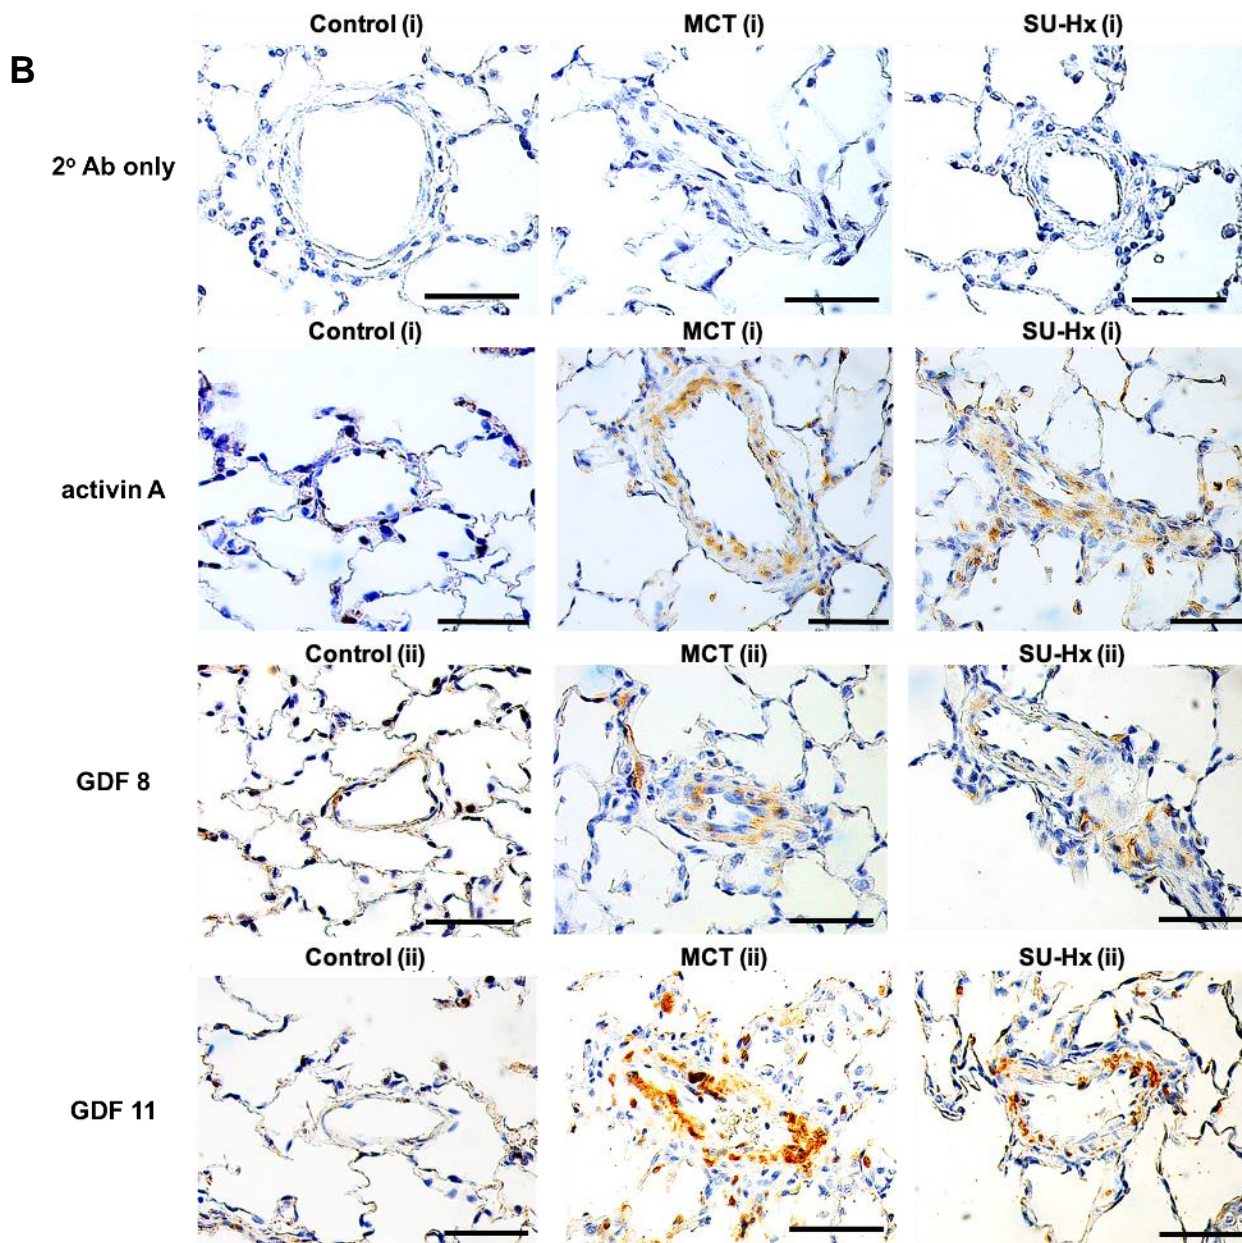

**Fig. S1. Specificity of immunohistochemistry for activin A, GDF 8, and GDF 11 in human and rat lung tissue.** Staining of paraffin embedded tissue sections with HRP-conjugated anti-goat IgG in normal and diseased **(A)** human and **(B)** rat tissues (top panels), in comparison to specific immunostaining for activin A, GDF8, and GDF11 seen with the addition of primary antibody in pulmonary vascular lesions of HPAH and IPAH human lung tissues, and MCT- and SU-Hx-treated rats. Samples are labeled (A-O) to represent distinct human explants ( $n = 15$ ) or labeled (i-iii) to represent distinct rats ( $n = 3$ ). Scale bars = 50  $\mu$ m.

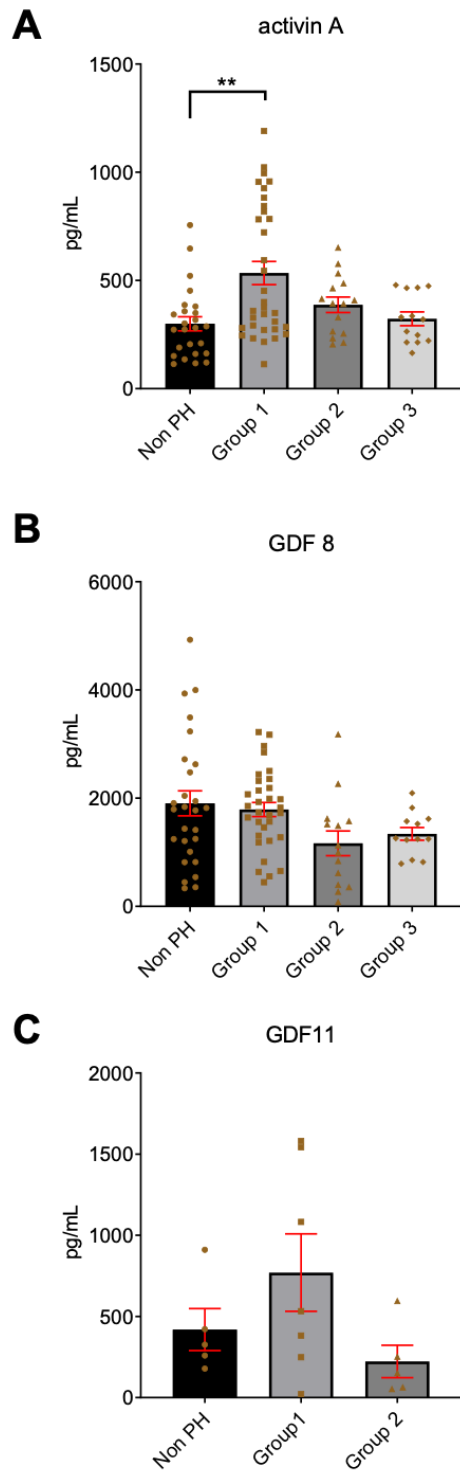

**Fig. S2. Circulating activin A is elevated in WHO Group 1 PAH.** Serum (A) activin A, (B) GDF8, and (C) GDF11 in samples obtained from a series of 135 patients including controls (no PH), Group 1 PAH, Group 2 PH, or Group 3 PH. Values are shown as mean  $\pm$  SEM,  $n = 5-40$  per group,  $**P < 0.01$ , one-way ANOVA with Dunnett's test for multiple comparisons.

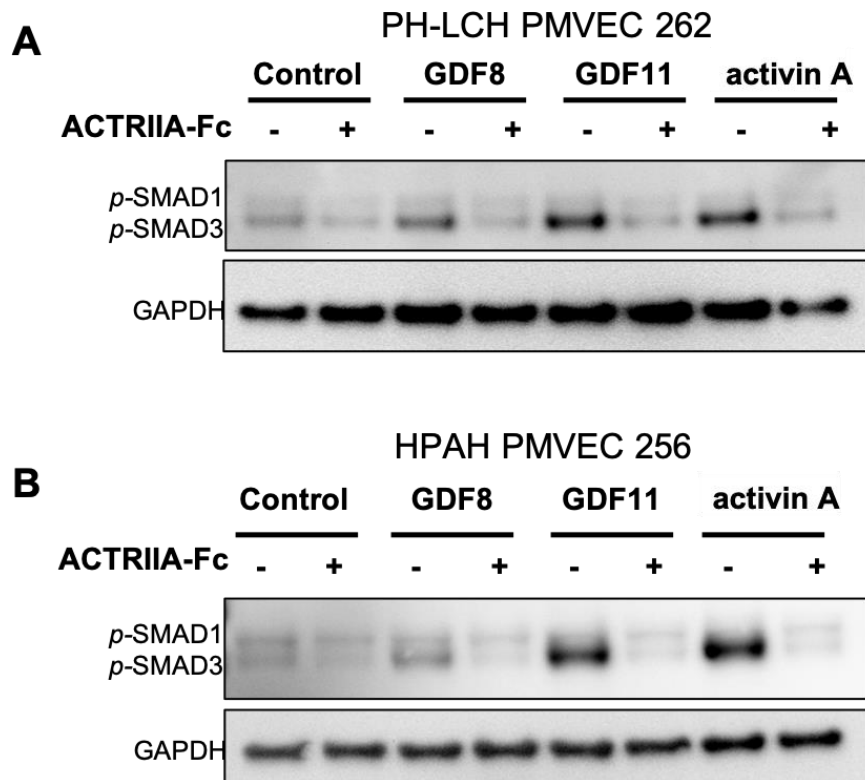

**Fig. S3. ACTRIIA-Fc modulates GDF8-, GDF11-, activin A-, and activin B-mediated signaling in microvascular endothelial and PSMCs isolated from PH donors. (A)**

Western blot analysis of phosphorylation of SMAD1 and SMAD3 in human PMVECs isolated from a donor with Group 5 PH due to Langerhans Cell Histiocytosis (PH-LCH, donor 262) treated with GDF8 (50 ng/mL), GDF11 (50 ng/mL), activin A (50 ng/mL), and activin B (50 ng/mL) for 30 min with or without treatment with ACTRIIA-Fc (2500 ng/mL). **(B)** Western blot analysis of phosphorylation of SMAD1 and SMAD3 in human PMVECs isolated from a donor with *BMPR2*-mutation positive HPAH (donor 256) treated with GDF8 (50 ng/mL), GDF11 (50 ng/mL), activin A (50 ng/mL), and activin B (50 ng/mL) for 30 min with or without treatment with ACTRIIA-Fc (2500 ng/mL). GAPDH serves as loading control. These results are representative of 4 independent experiments performed with 4 distinct cell donors.

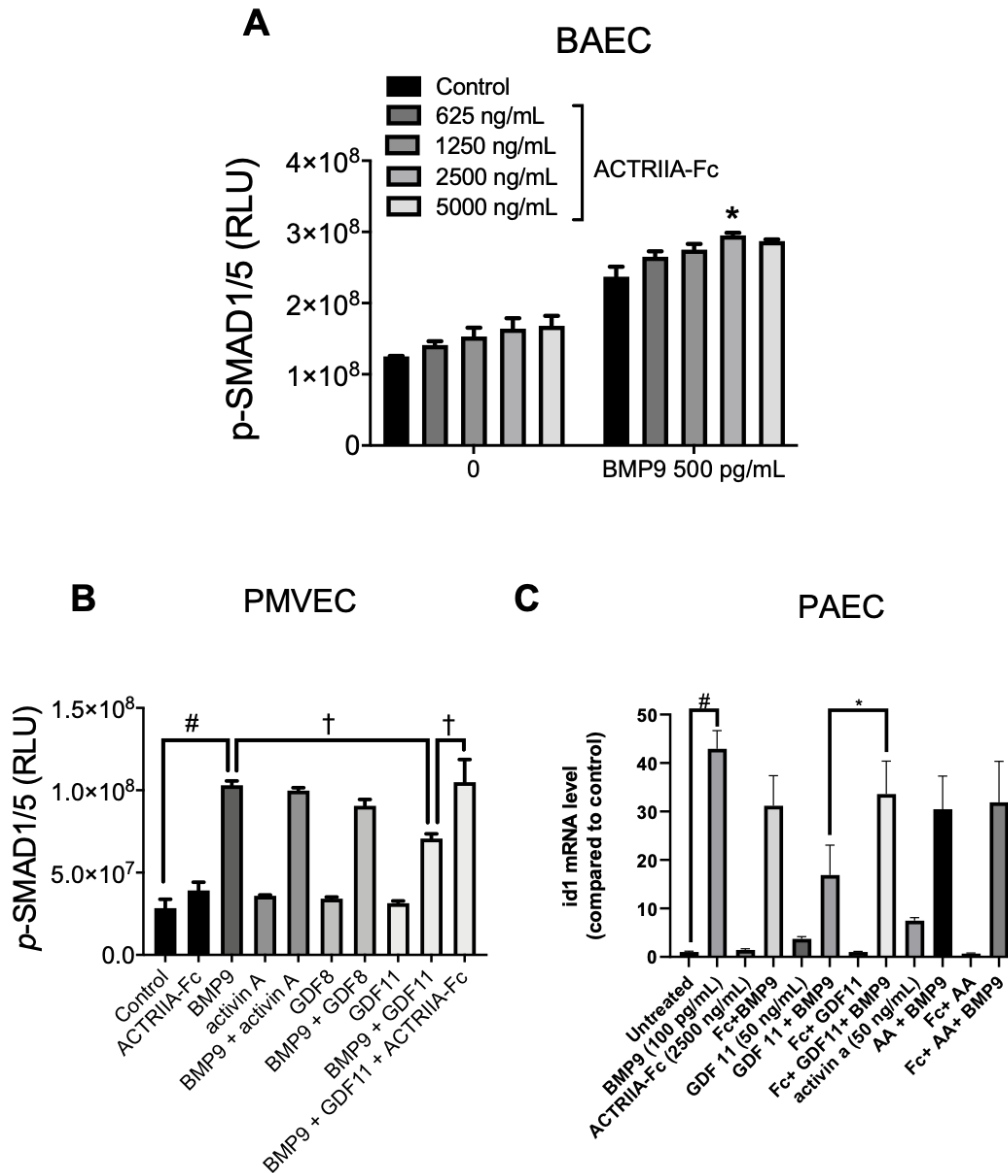

**Fig. S4. ACTRIIA-Fc enhances BMP9-induced signaling and blocks inhibition of BMP9 signaling by GDF11 in multiple endothelial cell lineages.** (A) The activation of SMAD1/5 was analyzed in bovine aortic endothelial cells (BAECs) treated with or without BMP9 (500 pg/mL) with varying concentrations of ACTRIIA-Fc by In-Cell Western. (B) The activation of SMAD1/5 was analyzed by In-Cell Western in PMVECs co-treated with GDF11 (50 ng/mL) and BMP9 (500 pg/mL) in comparison to treatment with BMP9, with or without ACTRIIA-Fc (2500 ng/mL). Data from (A-B) represent mean  $\pm$  SEM. \* $P$  < 0.05 \*\* $P$  < 0.01, † $P$  < 0.001, # $P$  < 0.0001 as indicated, one-way ANOVA with Sidak's or Tukey's test for multiple comparisons ( $n$  = 3-6). (C) Expression of *Id1* mRNA in human pulmonary aortic endothelial cells (PAECs) co-treated with GDF8, GDF11, and activin A (50 ng/mL each) or treated with BMP9 (500 pg/mL), with or without ACTRIIA-Fc (2500 ng/mL). Values are shown as mean  $\pm$  SEM,  $n$ =3-4 per group. \* $p$ <0.05, \*\* $p$ <0.01, † $p$ <0.001, # $p$ <0.0001 in comparison to without ACTRIIA-Fc treatment, two-way ANOVA with Dunnett's multiple comparisons test. These data are representative of 4 independent experiments performed using 3 distinct PMVEC or PAEC donors.

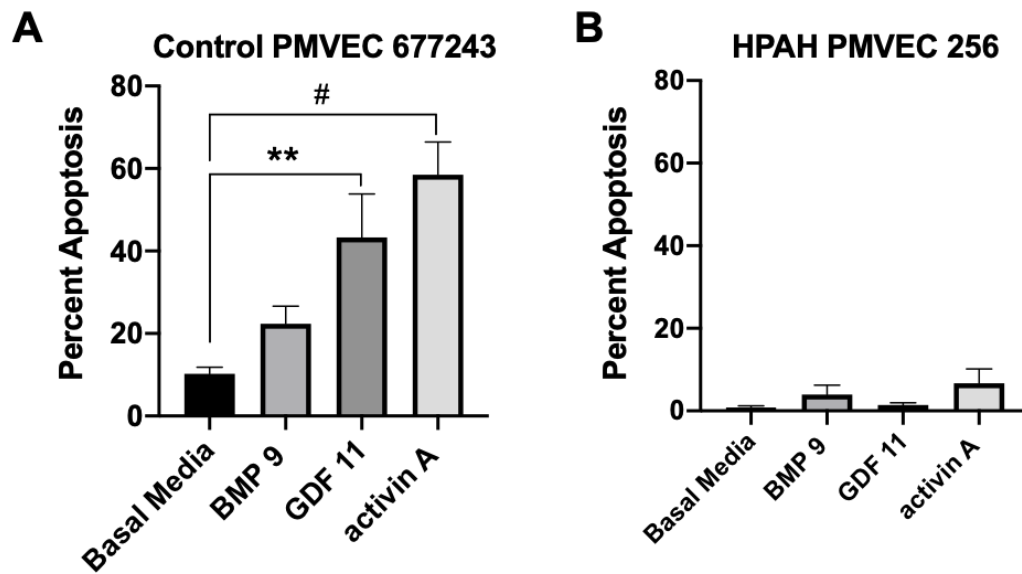

**Fig. S5. Differential basal and ligand-modulated apoptosis in PMVECs isolated from healthy and PH donors.** (A) Apoptosis analyzed by TUNEL and DAPI staining in control PMVECs (donor 677243) and (B) HPAH HPMVECs (donor 256) cultured in basal media (0.5% FBS) with or without the addition of BMP9 (1 ng/mL), GDF11 (100 ng/mL), or activin A (100 ng/mL) for 48 hours in chamber slides. The basal frequency of apoptotic cells was higher in control than HPAH-derived PMVECs ( $p=0.003$ ). Data represent mean  $\pm$  SEM.  $^*P < 0.05$   $^{**}P < 0.01$ ,  $^{\dagger}P < 0.001$ ,  $^{\#}P < 0.0001$  as indicated, one-way ANOVA with Sidak's or Tukey's test for multiple comparisons ( $n=3-6$ ). These data are representative of 3 independent experiments performed with 3 distinct control and PAH-derived PMVEC isolates.

**A**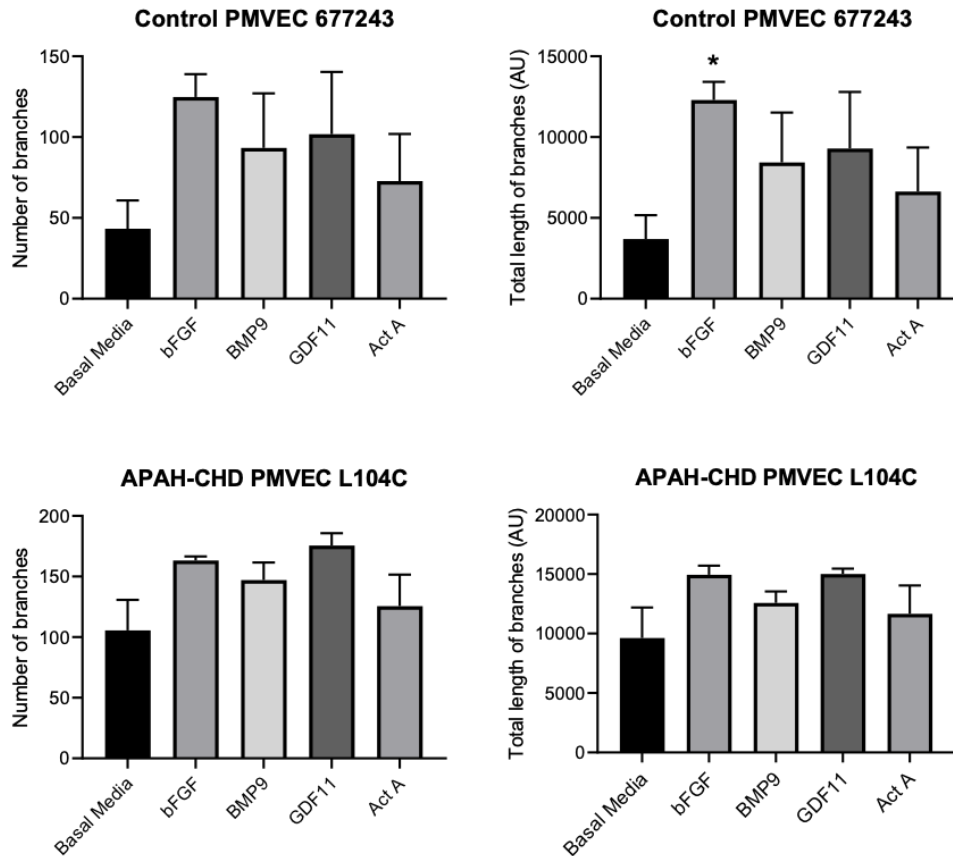**B**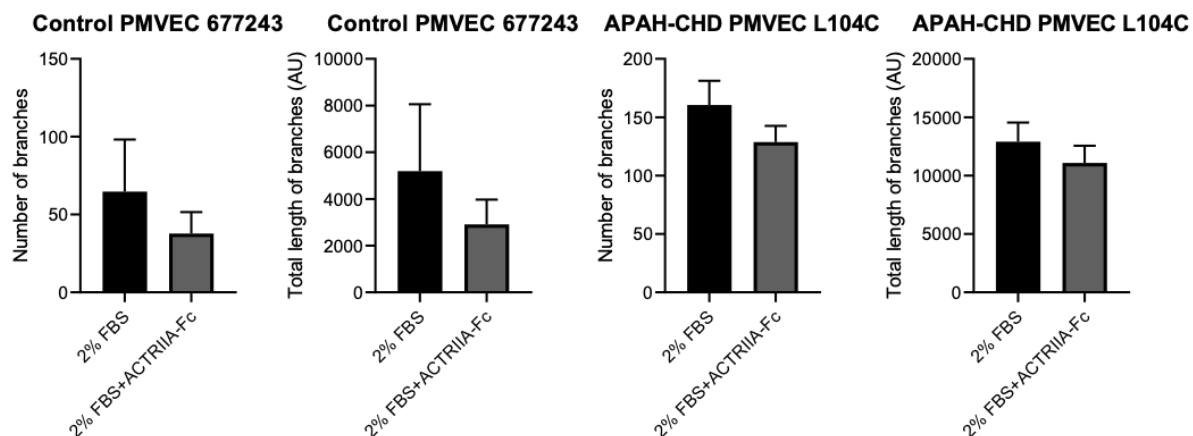

**Fig. S6. No significant impact of ACTRIIA-Fc or its ligands on endothelial tube formation in PMVECs from control and PAH donors. (A)** Control and PAH-derived PMVECs were plated in Geltrex matrix-coated wells and treated with VEGF (10 ng/mL), bFGF (10 ng/mL), BMP9 (1 ng/mL), GDF11 (100 ng/L), GDF8 (100 ng/mL), activin A (100 ng/mL), or activin B (100 ng/mL) in basal media (0.5% FBS) and numbers of branches and branch lengths quantified at 14 h using the ImageJ Angiogenesis Analyzer suite. **(B)** Control and PAH-derived PMVECs were treated with 2% FBS in basal media with or without the addition of ACTRIIA-Fc (2500 ng/mL), and branches and branch lengths quantified at 14 h. Data represent mean  $\pm$  SEM,  $n=4$ . \* $P < 0.05$  as indicated vs. basal media, Brown-Forsythe and Welch ANOVA. These results are representative of two independent experiments using two distinct control or PAH donor-derived cells each.

## Control PASMCM

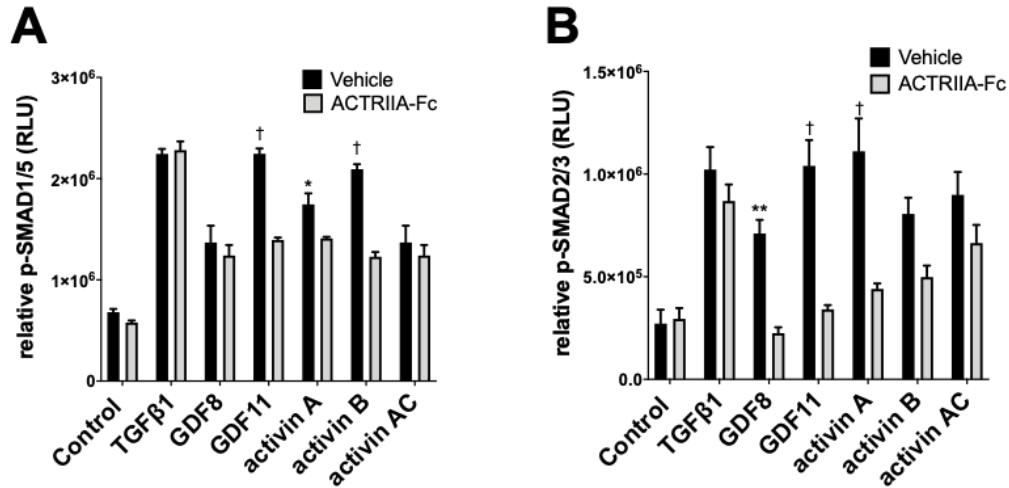

**C**

## HPAH PASMCM 256

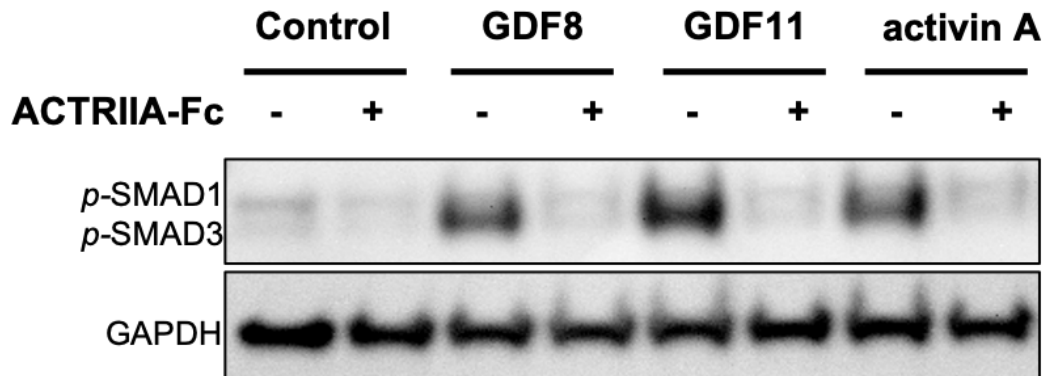

**Fig. S7. Impact of ACTRIIA-Fc on ligand-mediated SMAD signaling in control and PAH-derived PASMCMs.** (A) Activation of SMAD1/5 in human PASMCMs exposed to GDF11 (100 ng/mL), activin A (100 ng/mL), activin B (100 ng/mL), TGFβ1 (1.25 ng/mL), GDF8 (100 ng/mL), and activin AC (100 ng/mL) in the presence or absence of ACTRIIA-Fc (2500 ng/mL) analyzed by In-Cell Western. (B) Activation of SMAD2/3 in human PASMCMs under the same conditions as in (A). For (A-B), all values are shown as mean ± SEM, n=3-8 per group. \**P* < 0.05, \*\**P* < 0.01, †*P* < 0.001 in comparison with ACTRIIA-Fc treatment, one-way ANOVA with Sidak's test for multiple comparisons. (C) Western blot showing activation of SMAD1 and SMAD3 in HPAH-derived PASMCMs (donor 256) treated with GDF8 (50 ng/mL), GDF11 (50 ng/mL), and activin A (50 ng/mL) with or without ACTRIIA-Fc (2500 ng/mL). These results are representative of 3 independent experiments performed with 3 distinct control or PAH donor derived PASMCM isolates.

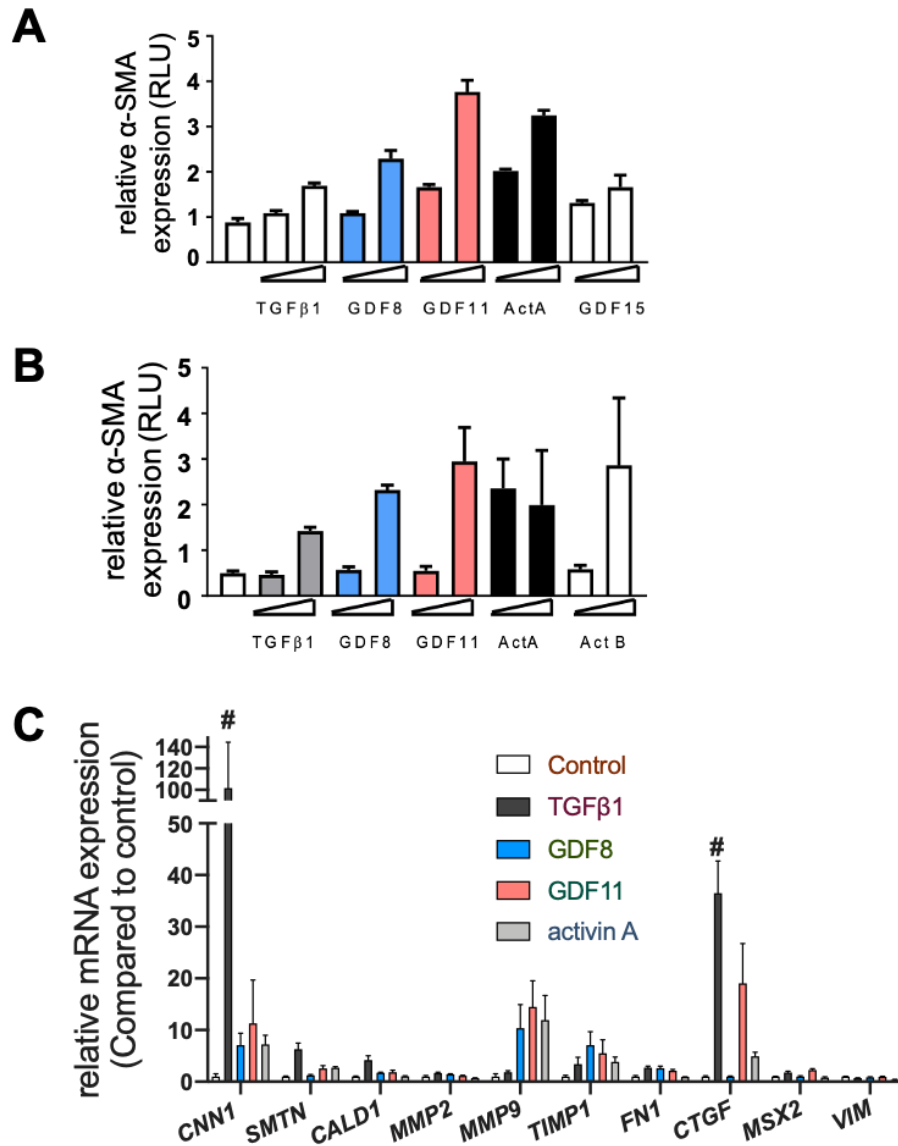

**Fig. S8. Modulation of smooth muscle phenotypic genes by BMP, GDF, activin, and TGF $\beta$  ligands in human PSMCs.** (A-B) The expression of  $\alpha$ -SMA was assayed by In-Cell Western in PSMCs following 72 h treatment with varying concentrations of TGF $\beta$ 1 (0.25 and 2.5 ng/mL), GDF8 (25 and 100 ng/mL), GDF11 (25 and 100 ng/mL), activin A (25 and 100 ng/mL), activin B (25 and 100 ng/mL) and GDF15 (25 and 100 ng/mL). The ability of GDF8, GDF11, and activin A to induce the expression of  $\alpha$ -SMA was consistent across multiple isolates of human PSMCs obtained from distinct donors. (C) Expression of smooth muscle phenotypic genes known to be regulated by TGF $\beta$ 1 in PSMCs following exposure to GDF8, GDF11 and activin A. For A-C, all values are shown as mean  $\pm$  SEM, n=3-8 per group. \* $P$  < 0.05, \*\* $P$  < 0.01,  $^{\dagger}$  $P$  < 0.001,  $^{\#}$  $P$  < 0.001 in comparison with control, one-way ANOVA with Sidak's test for multiple comparisons.

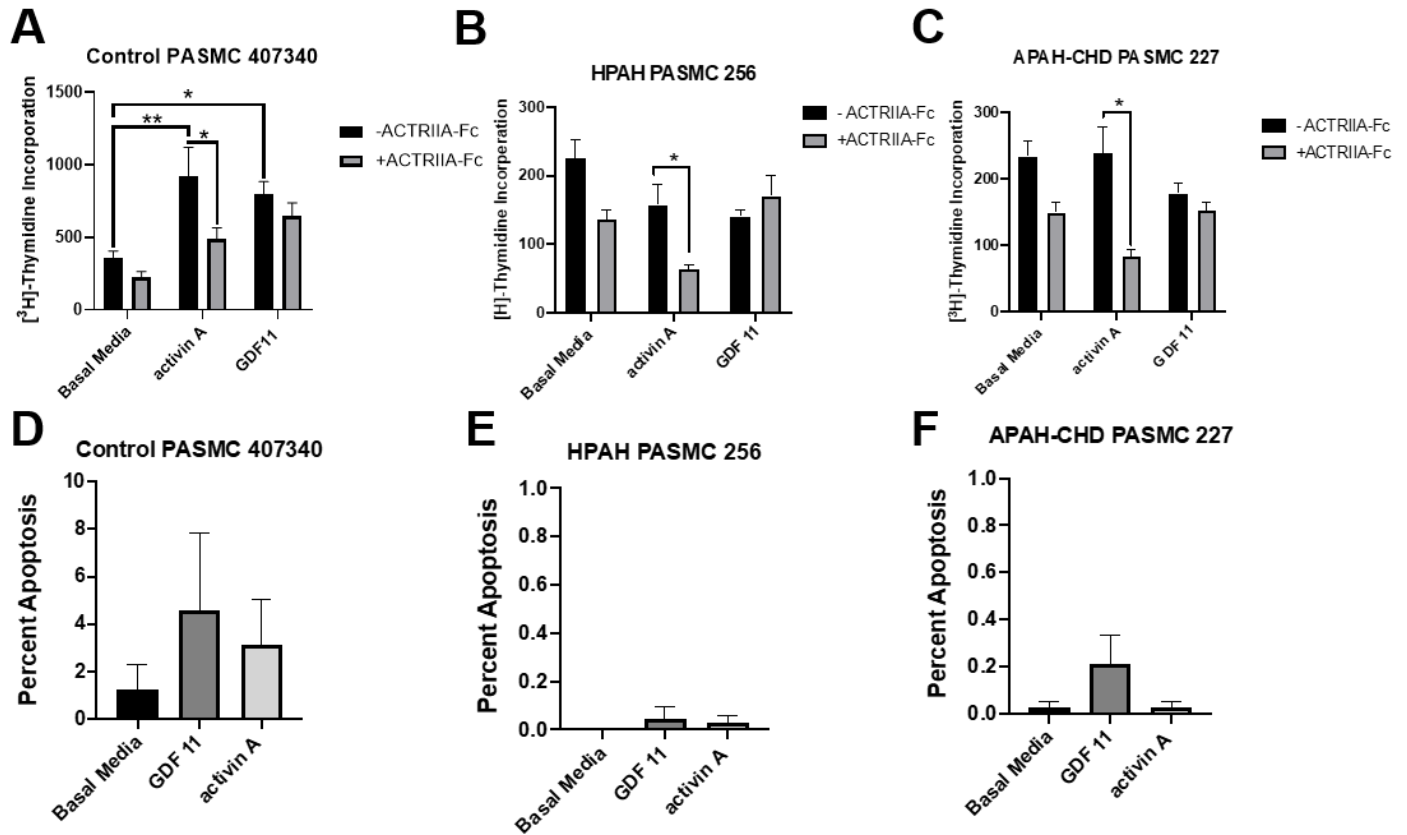

**Fig. S9. Impact of ACTRIIA-Fc on proliferation and apoptosis in PSMCs isolated from both control and PH donors.** (A) Control PSMCs (donor 407340), (B) HPAH PSMCs (donor 256), and (C) APAH-CHD PSMCs (isolated from donor 227) were deprived of serum for 24 h and treated with GDF11 (100 ng/mL), activin A (100 ng/mL), or complete media with or without ACTRIIA-Fc (2500 ng/mL) for 48 h, and proliferation measured by  $^3\text{H}$ -thymidine incorporation during the last 6 h of culture. Data represent mean  $\pm$  SEM. \* $P < 0.05$  \*\* $P < 0.01$ ,  $^{\dagger}P < 0.001$ ,  $^{\#}P < 0.0001$  as indicated, one-way ANOVA with Sidak's or Tukey's test for multiple comparisons ( $n = 3-6$ ). (D) Control PSMCs (donor 407340), (E) HPAH PSMCs (donor 256), and (F) APAH-CHD PSMCs (donor 227) were cultured in basal media with or without exogenous GDF11 (100 ng/mL) or activin A (100 ng/mL) for 48 h in chamber slides and apoptotic cells were measured by TUNEL and DAPI staining. Data represent mean  $\pm$  SEM ( $n = 3-6$ ). These data are representative of 3 independent experiments performed with 3 distinct control or PAH-derived PSMC isolates.

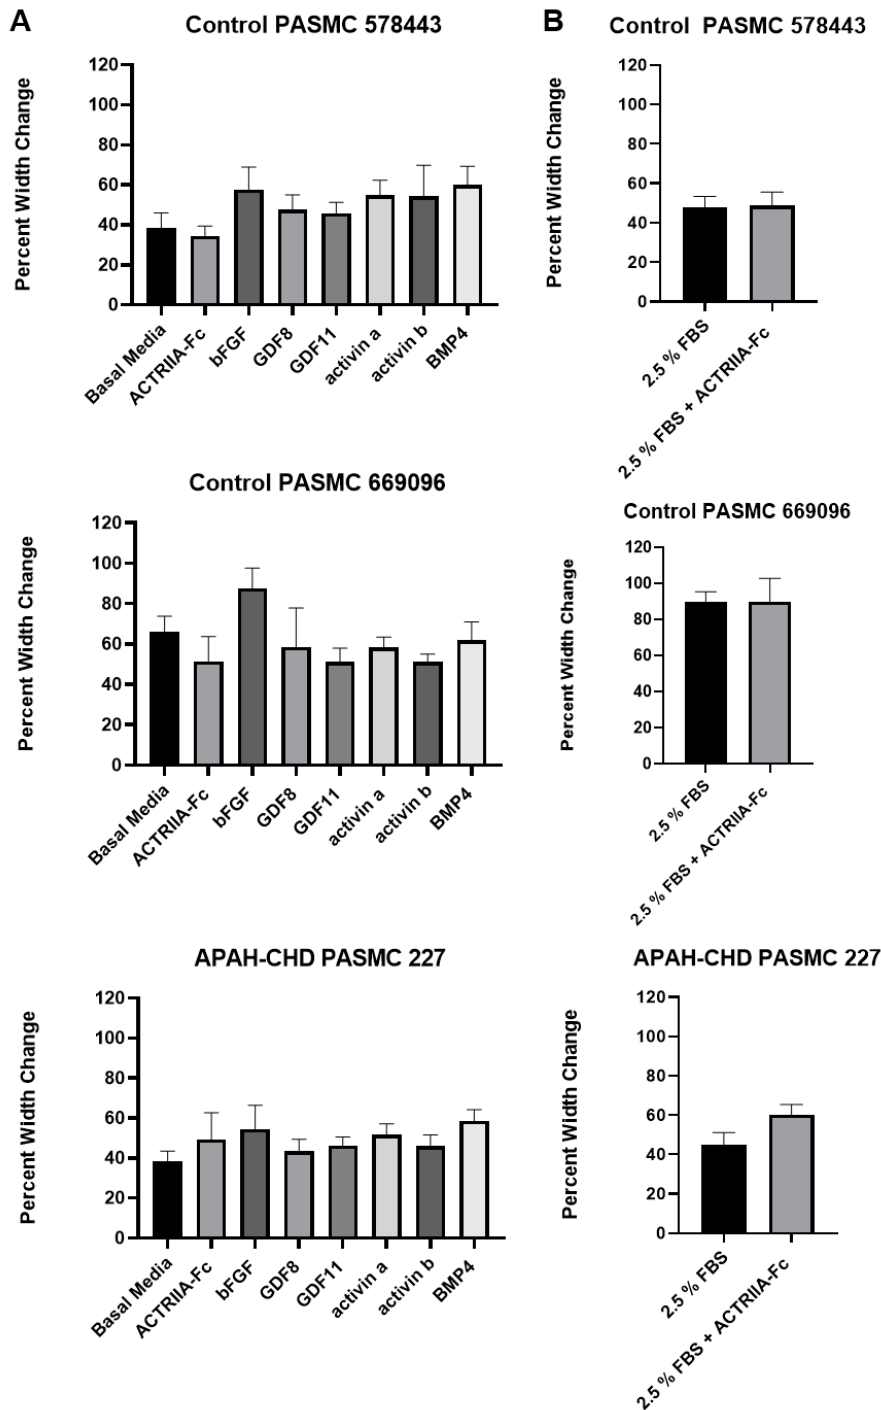

**Fig. S10. Impact of ACTRIIA-Fc on cell migration in cultured PSMCs from healthy and PH donors.** Cells were grown to confluency and treated with (A) ACTRIIA-Fc (2500 ng/mL), bFGF (10 ng/mL), GDF 8 (100 ng/mL), GDF 11 (100 ng/L), activin A (100 ng/mL), activin B (100 ng/mL), or BMP4 (25 ng/mL) in 0.25% FBS basal media, or (B) treated with 2.5% FBS basal media with and without the addition ACTRIIA-Fc (2500 ng/mL). Following scratch injury, the monolayer was photographed and width measured at multiple sites at 0 and 48 h for each condition. (n=10 replicate measurements for each condition). These data are representative of 2 independent experiments performed with 2 distinct control or PAH-derived PSMC isolates.

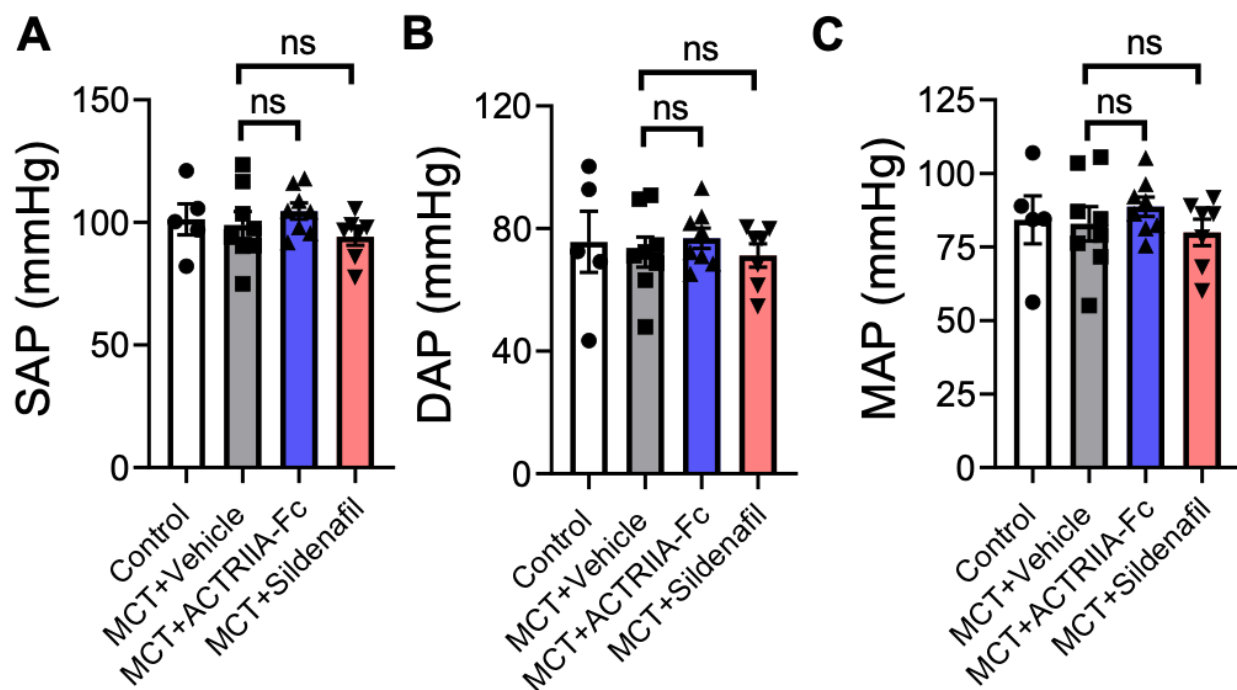

**Fig. S11. Treatment with ACTRIIA-Fc or sildenafil does not alter systemic arterial blood pressure in MCT-treated rats.** (A) Systolic arterial pressure (SAP), (B) diastolic arterial pressure (DAP), and (C) mean arterial pressure (MAP) in rats given MCT (40 mg/kg s.c.) followed by 4 weeks of treatment with ACTRIIA-Fc (15 mg/kg, i.p. twice weekly), sildenafil (30 mg/kg, p.o. BID), or vehicle (10 mM TBS). Values are shown as mean  $\pm$  SEM,  $n=5-8$  per group. (NS=non-significant, one-way ANOVA with Dunnett's test for multiple comparisons)

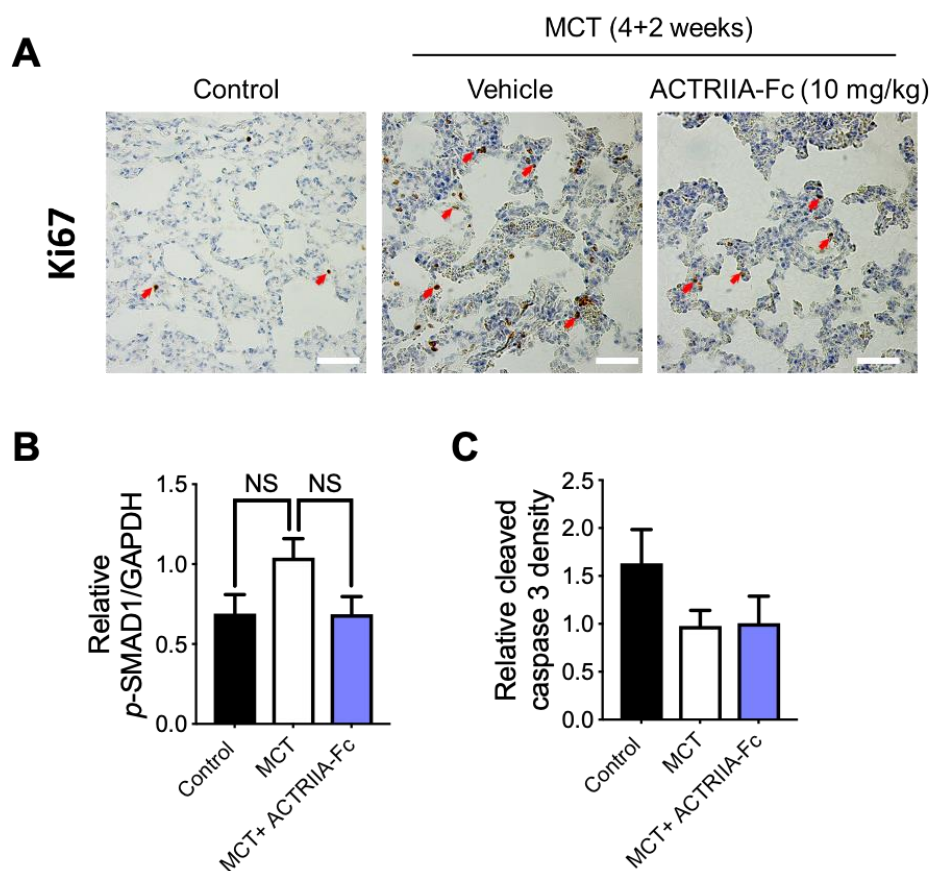

**Fig. S12. Effects of ACTRIIA-Fc on cell proliferation and signaling in experimental PH.** (A) Representative images of Ki67-positive cells (brown, red arrows) in rat lung tissue from rats exposed to MCT for 4 weeks followed by treatment with vehicle or ACTRIIA-Fc (10 mg/kg twice weekly s.c.) for 2 weeks as compared to normoxic control rats. Scale bars = 50  $\mu$ m (B) Lung protein extracts obtained from rats in (A) analyzed for phosphorylated SMAD1/5 by densitometric analysis of Western blot. (C) Expression of cleaved caspase 3 in lung protein extracts obtained from rats in (A) analyzed as in (B). Values are shown as mean  $\pm$  SEM, n=5 per group. (NS = non-significant, one-way ANOVA with Dunnett's test for multiple comparisons)

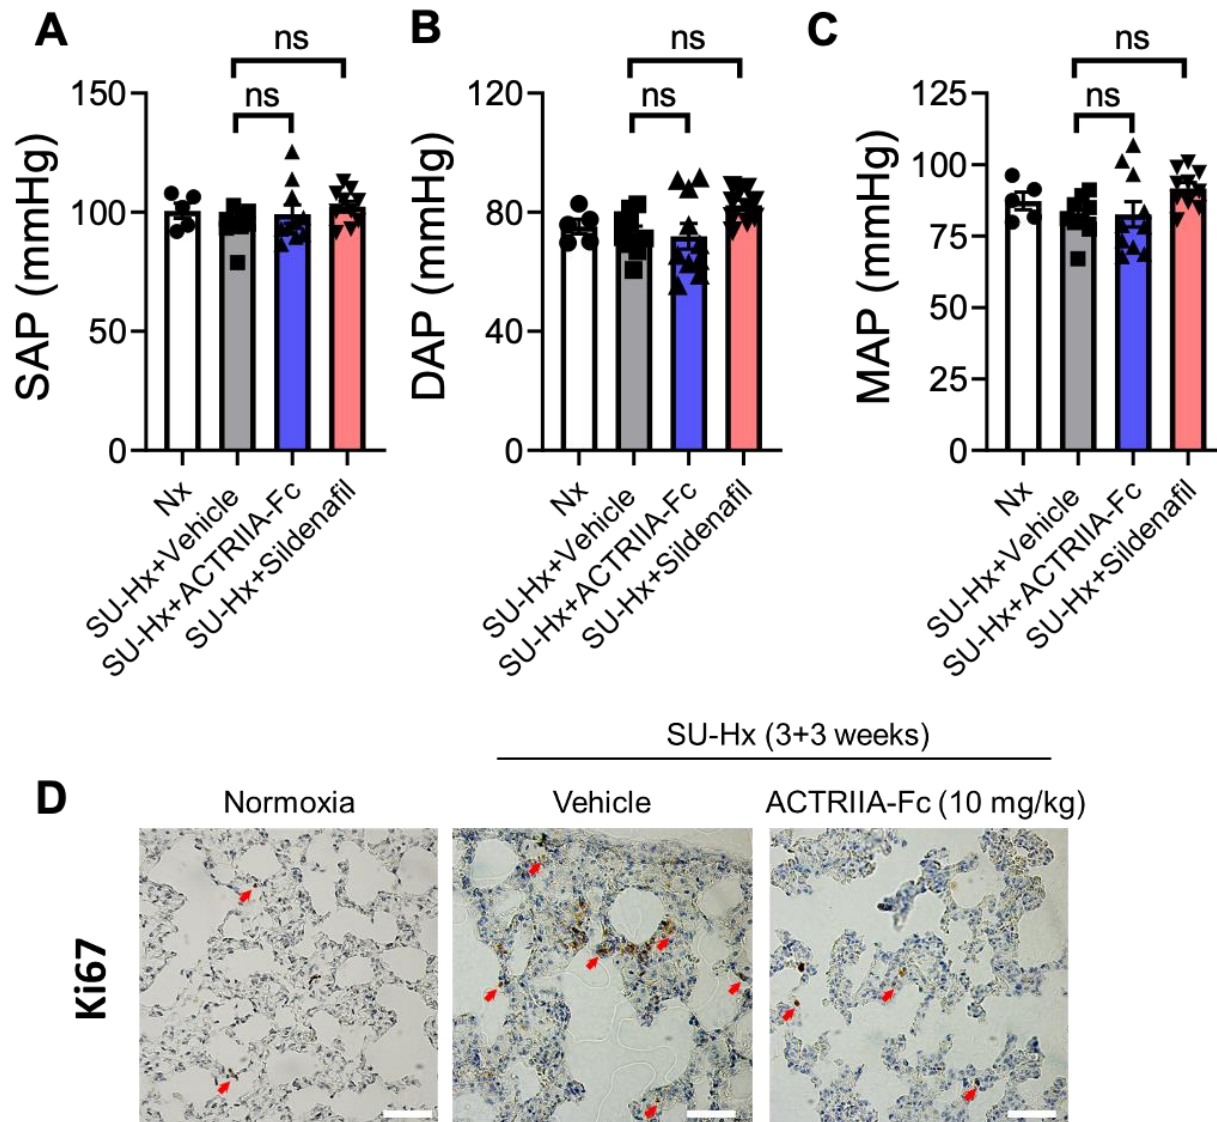

**Fig. S13. Treatment with ACTRIIA-Fc or sildenafil does not alter systemic arterial blood pressure in the SU-Hx rat model.** (A) Systolic arterial pressure (SAP), (B) diastolic arterial pressure (DAP), and (C) mean arterial pressure (MAP) in rats treated with SU-Hx (200 mg/kg s.c., FIO<sub>2</sub>=0.10 for four weeks) with prophylactic treatment with ACTRIIA-Fc (10 mg/kg, i.p. twice weekly), sildenafil (60 mg/kg, p.o. BID), or vehicle (10 mM TBS) for 4 weeks. Values are shown as mean ± SEM, n=5-10 per group. (NS=not significant, one-way ANOVA with Dunnett's test for multiple comparisons). (D) In the SU-Hx rescue treatment model, representative images of Ki67-positive cells (brown, red arrows) in rat lungs from rats exposed to SU-Hx for 3 weeks followed by vehicle or ACTRIIA-Fc (10 mg/kg twice weekly i.p.) for 3 weeks, as compared to normoxic control rats. Scale bars = 50 µm.

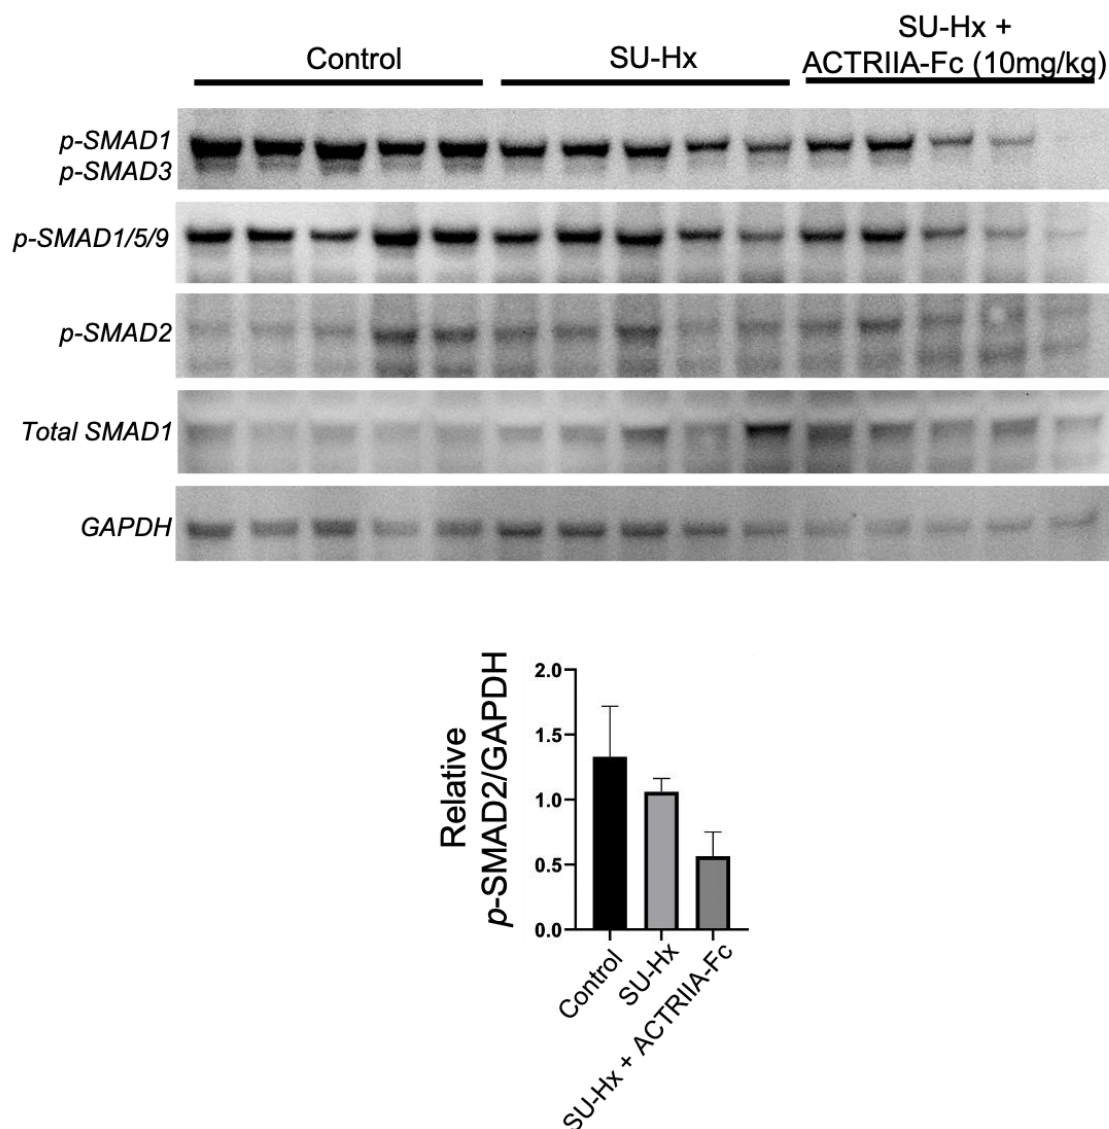

**Fig. S14. Western blot analysis of SMAD signaling in the SU-Hx rescue model.** Whole lung extracts from rats exposed to SU-Hx for 3 weeks followed by 3 weeks of treatment with vehicle or ACTRIIA-Fc were analyzed by Western blot for *p-SMAD1/5/9*, *p-SMAD1/3*, *p-SMAD2*, total SMAD1 and GAPDH, and subjected to densitometric analysis and normalized to GAPDH.

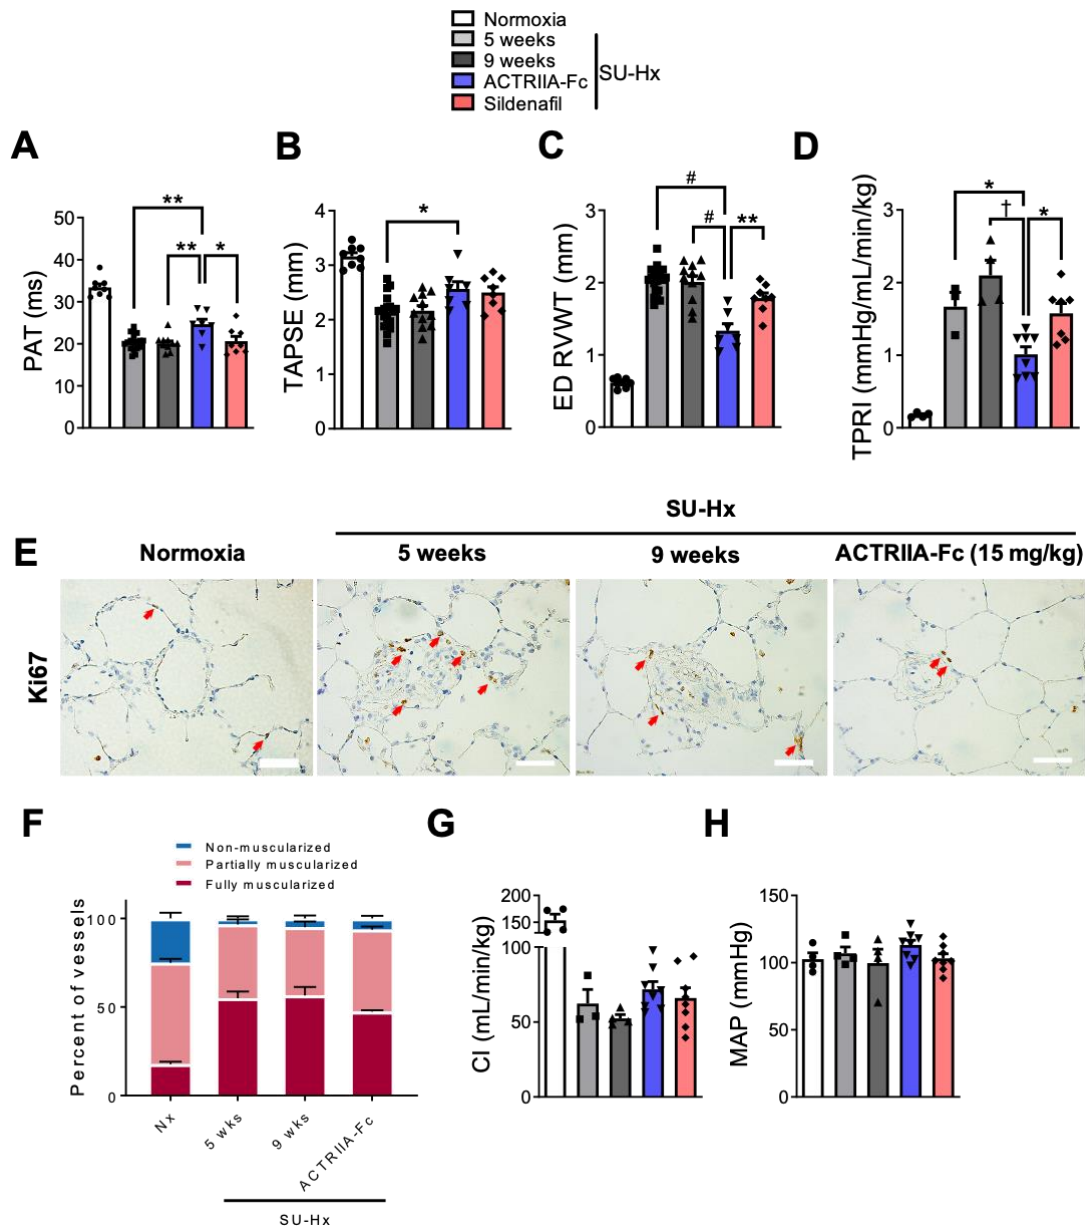

**Fig. S15. Treatment with ACTRIIA-Fc improves echocardiographic measures of RV function and PH after SU-Hx exposure.** (A) Ultrasound measurement of pulmonary arterial acceleration time (PAT), (B) RV function by tricuspid annular plane systolic excursion (TAPSE), (C) RV hypertrophy measured by end-diastolic right ventricular wall thickness (ED RVWT), and (D) total peripheral resistance index (TPRI) in ACTRIIA-Fc-treated, sildenafil-treated, or untreated animals at weeks 5 and 9 following SU-Hx. Values are shown as mean  $\pm$  SEM,  $n=3-19$  per group.  $*P < 0.05$ ,  $**P < 0.01$ ,  $^{\dagger}P < 0.001$ ,  $^{\#}P < 0.0001$  one-way ANOVA with Tukey's test for multiple comparisons. (E) Representative images of Ki67-positive cells (brown, red arrows) in lung tissue from SU-Hx rats treated with or without ACTRIIA-Fc. Scale bars = 50  $\mu$ m. (F) The percentage of muscularized small vessels (<50  $\mu$ m diameter) analyzed by histomorphometry as in (E),  $n = 3-5$  per group (30-50 vessels counted per sample). Values are shown as mean  $\pm$  SEM, two-way ANOVA with Dunnett's test for multiple comparisons. (G) Cardiac index (CI) and (H) systemic mean arterial pressure (MAP) in SU-Hx rats treated as in (A). For G-H, values are shown as mean  $\pm$  SEM,  $n=3-8$  per group. One-way ANOVA with Tukey's post-test.

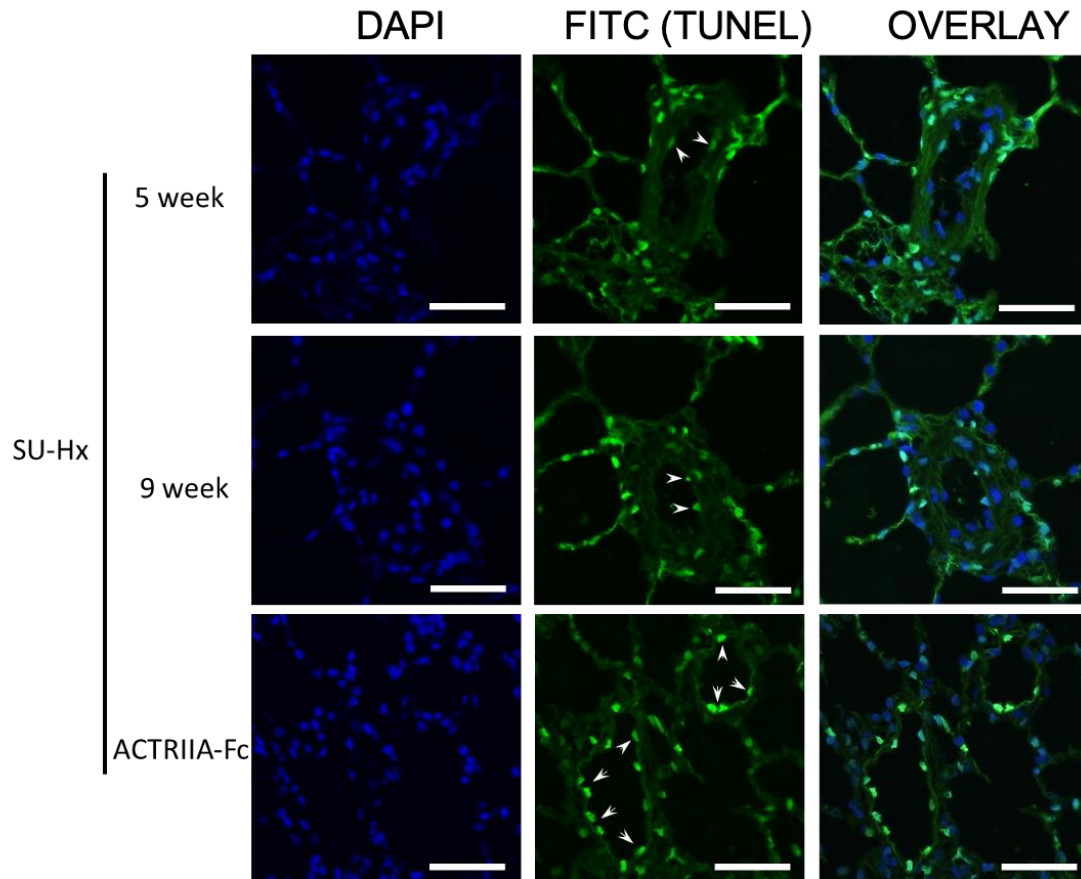

**Fig. S16. ACTRIIA-Fc increases apoptosis in small vessels of severe obliterative PH.** TUNEL-positive (green, white arrows) apoptotic cells in the walls of small vessels (<50  $\mu\text{m}$  diameter) in lung tissues obtained from rats following 3 weeks of SU-Hx + 2 weeks or 6 weeks of normoxia (labeled 5 week and 9 week respectively) in paraffin-fixed sections counterstained with DAPI nuclear stain (blue), compared with treatment with ACTRIIA-Fc for 4 weeks following 3 weeks of SU-Hx + 2 weeks of normoxia (labeled ACTRIIA-Fc). Images shown are representative of 15-30 random fields analyzed from  $n=4-6$  distinct animals in each treatment group, scale bars = 50  $\mu\text{m}$ .

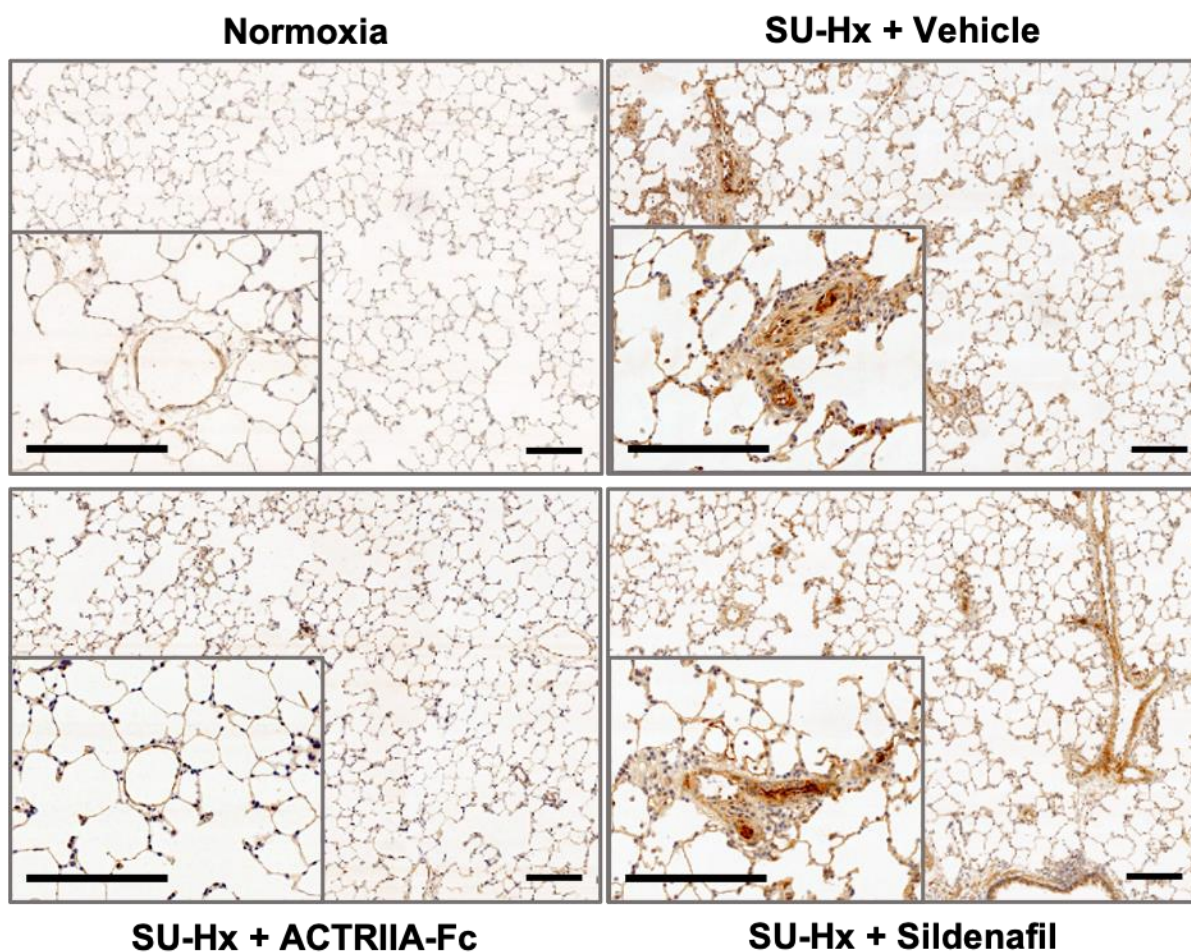

— = 200 $\mu$ m

**Fig. S17. ACTRIIA-Fc normalized *p*-SMAD2/3 expression in the severe obliterative SU-Hx rat model.** Immunohistochemical staining for *p*-SMAD2/3 was performed on paraffin-embedded lung sections from SU-Hx exposed rats (3 weeks, followed by 2 weeks of normoxia, followed by 4 weeks of treatment with vehicle, sildenafil, or ACTRIIA-Fc) and normoxic controls. HRP-conjugated secondary antibody (DAB; brown) and nuclei counterstain with hematoxylin. Representative images are shown for each treatment group. Scale bars = 200  $\mu$ m.

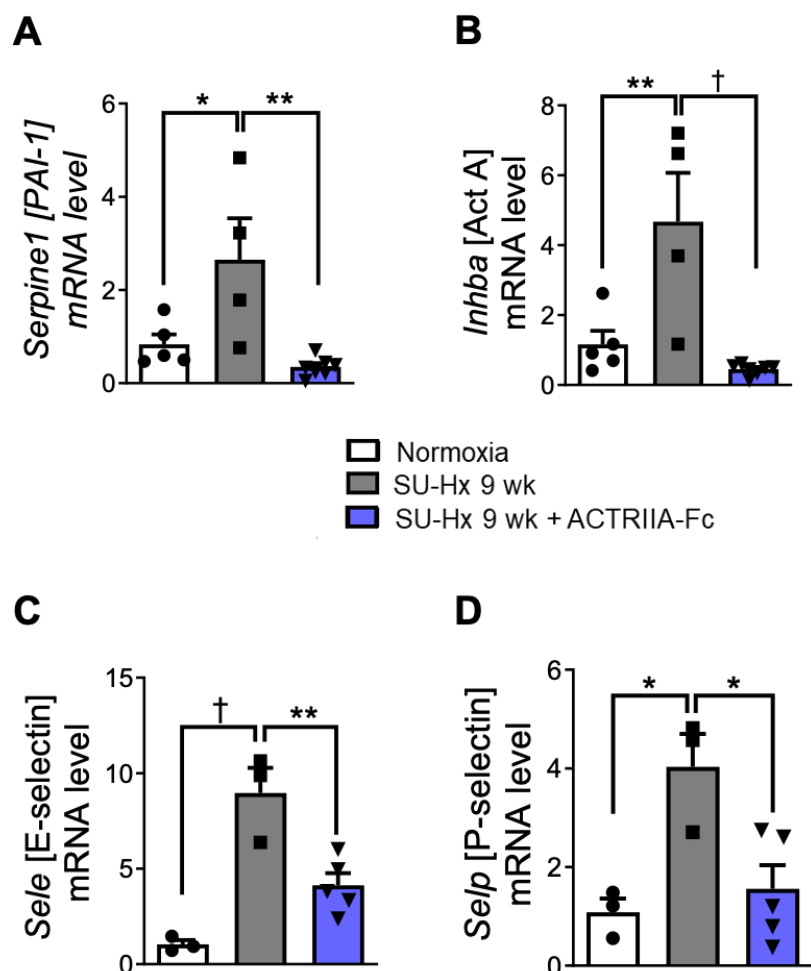

**Fig. S18. ACTRIIA-Fc attenuated expression of Pai-1 (*Serpine1*), activin A (*Inhba*), E-selectin (*Sele*), and P-selectin (*Selp*) mRNA in the severe obliterative SU-Hx rat model.** (A) *Serpine1* and (B) *Inhba* mRNA expression in rats with severe PH, following 3 weeks of SU-Hx and 6 weeks of normoxia, with or without delayed treatment with ACTRIIA-Fc. (C) *Sele* and (D) *Selp* mRNA expression in SU-Hx rats with or without delayed ACTRIIA-Fc treatment. Values are shown as mean  $\pm$  SEM,  $n = 3-7$  per group. \* $P < 0.05$ , \*\* $P < 0.01$ ,  $^{\dagger}P < 0.001$  in comparison with SU-Hx 9 wk, one-way ANOVA with Dunnett's test for multiple comparisons.

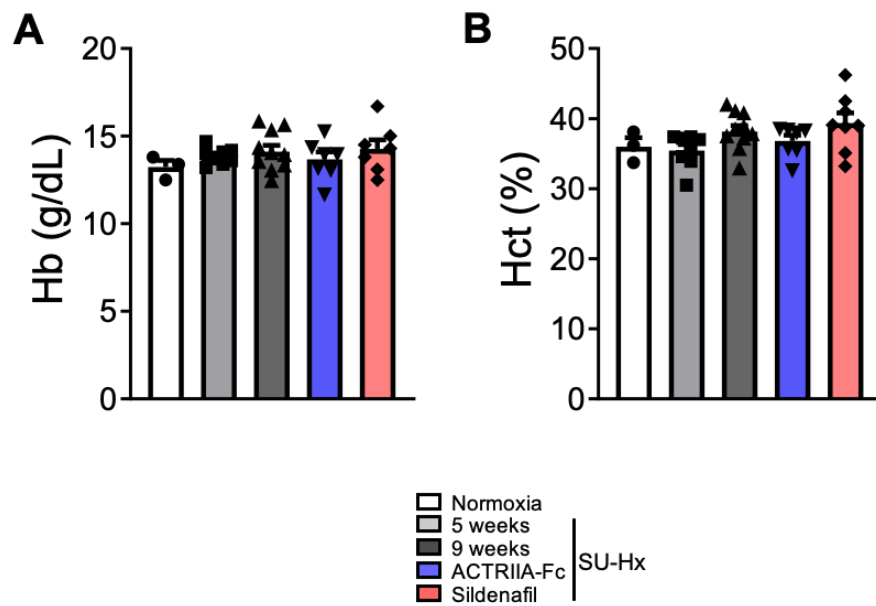

**Fig. S19. Treatment of rats with ACTRIIA-Fc in the severe obliterative SU-Hx model did not affect red cell mass. (A)** Hemoglobin (Hb) and **(B)** hematocrit (Hct) in SU-Hx-exposed rats treated with or without ACTRIIA-Fc at 5 and 9 weeks following SU-Hx. Values are shown as mean  $\pm$  SEM,  $n = 3-9$  per group. One-way ANOVA with Tukey's test for multiple comparisons.

**Table S1. Donor characteristics of serum samples used in the present study.**

|                                         | Non-PH                  | WHO Group 1             | WHO Group 2             | WHO Group 3             |
|-----------------------------------------|-------------------------|-------------------------|-------------------------|-------------------------|
| Total sample size, n                    | 29                      | 34                      | 15                      | 13                      |
| Gender, female subjects, n (%)          | 21 (72.4)               | 25 (73.5)               | 11 (73.3)               | 8 (61.5)                |
| BMI mean $\pm$ SEM                      | 27.1 $\pm$ 1.4          | 30.2 $\pm$ 1.8          | 34.7 $\pm$ 2.3          | 28.8 $\pm$ 2.2          |
| Age years $\pm$ SEM                     | 53.0 $\pm$ 2.8          | 52.5 $\pm$ 2.5          | 65.8 $\pm$ 3.1          | 64.3 $\pm$ 4.3          |
| PAH etiology                            |                         |                         |                         |                         |
| IPAH, n (%)                             | 0 (0)                   | 10 (29.4)               | 0 (0)                   | 0 (0)                   |
| HPAH, n (%)                             | 0 (0)                   | 0 (0)                   | 0 (0)                   | 0 (0)                   |
| APAH-CTD, n (%)                         | 0 (0)                   | 6 (17.6)                | 0 (0)                   | 0 (0)                   |
| APAH-STIM, n (%)                        | 0 (0)                   | 0 (0)                   | 0 (0)                   | 0 (0)                   |
| APAH-CHD, n (%)                         | 0 (0)                   | 1 (2.9)                 | 0 (0)                   | 0 (0)                   |
| APAH-HIV, n (%)                         | 0 (0)                   | 2 (5.9)                 | 0 (0)                   | 0 (0)                   |
| APAH-PoPH, n (%)                        | 0 (0)                   | 13 (38.2)               | 0 (0)                   | 0 (0)                   |
| PVOD, n (%)                             | 0 (0)                   | 2 (5.9)                 | 0 (0)                   | 0 (0)                   |
| NYHA functional class, n (%)            |                         |                         |                         |                         |
| NYHA, all, n                            | 27                      | 28                      | 13                      | 12                      |
| Class I, n (%)                          | 5 (17.2)                | 3 (8.8)                 | 0 (0)                   | 2 (15.4)                |
| Class II, n (%)                         | 10 (34.5)               | 10 (29.4)               | 8 (53.3)                | 4 (30.8)                |
| Class III, n (%)                        | 12 (41.4)               | 14 (41.2)               | 4 (26.7)                | 6 (46.2)                |
| Class IV, n (%)                         | 0 (0)                   | 1 (2.9)                 | 1 (6.7)                 | 0 (0)                   |
| RHC measurements, mean $\pm$ SEM        |                         |                         |                         |                         |
| RAP (mmHg) $\pm$ SEM, n                 | 4.80 $\pm$ 0.68,<br>25  | 9.63 $\pm$ 0.95,<br>32  | 13.29 $\pm$ 2.05,<br>14 | 7.85 $\pm$ 1.13,<br>13  |
| mPAP (mmHg) $\pm$ SEM, n                | 19.00 $\pm$ 0.77,<br>28 | 50.53 $\pm$ 2.32,<br>34 | 42.80 $\pm$ 2.90,<br>15 | 33.23 $\pm$ 2.41,<br>13 |
| PCWP (mmHg) $\pm$ SEM, n                | 10.07 $\pm$ 0.87,<br>29 | 11.03 $\pm$ 0.80,<br>34 | 24.47 $\pm$ 1.01,<br>15 | 11.77 $\pm$ 1.35,<br>13 |
| CO (L/min) $\pm$ SEM, n                 | 6.55 $\pm$ 0.56,<br>28  | 5.31 $\pm$ 0.36,<br>33  | 5.66 $\pm$ 0.44,<br>15  | 5.22 $\pm$ 0.53,<br>13  |
| CI (L/min/m <sup>2</sup> ) $\pm$ SEM, n | 3.58 $\pm$ 0.26,<br>28  | 2.76 $\pm$ 0.18,<br>33  | 2.69 $\pm$ 0.17,<br>15  | 2.90 $\pm$ 0.25,<br>13  |
| PVR (Wood units) $\pm$ SEM, n           | 1.38 $\pm$ 0.23,<br>13  | 8.45 $\pm$ 0.98,<br>25  | 3.48 $\pm$ 0.46,<br>15  | 4.87 $\pm$ 0.92,<br>13  |
| PAH therapy, n (%)                      |                         |                         |                         |                         |
| Prostacyclin analogue, n (%)            | 0 (0)                   | 6 (17.6)                | 0 (0)                   | 0 (0)                   |
| Endothelin antagonist, n (%)            | 0 (0)                   | 6 (17.6)                | 2 (13.3)                | 2 (15.4)                |
| PDE-5 inhibitor, n (%)                  | 1 (3.4)                 | 15 (44.1)               | 4 (26.7)                | 3 (23.1)                |

**Table S2. Total number of rats and mice included in the present study.**

|                                 | Experimental group        | Starting number of animals | Hemodynamic data excluded from analysis due to premature mortality or low heart rate (<350 bpm) during right ventricular catheterization | Final number included in hemodynamic analysis |
|---------------------------------|---------------------------|----------------------------|------------------------------------------------------------------------------------------------------------------------------------------|-----------------------------------------------|
| <b>MCT prophylaxis</b>          | Control                   | 5                          | 0                                                                                                                                        | 5                                             |
|                                 | MCT+Vehicle               | 8                          | 2                                                                                                                                        | 6                                             |
|                                 | MCT+ACTRIIA-Fc            | 9                          | 2                                                                                                                                        | 7                                             |
|                                 | MCT+Sildenafil            | 7                          | 1                                                                                                                                        | 6                                             |
| <b>MCT rescue</b>               | Control                   | 6                          | 0                                                                                                                                        | 6                                             |
|                                 | MCT+Vehicle               | 10                         | 0                                                                                                                                        | 10                                            |
|                                 | MCT+ACTRIIA-Fc 1 mg/kg    | 10                         | 1                                                                                                                                        | 9                                             |
|                                 | MCT+ACTRIIA-Fc 3 mg/kg    | 10                         | 0                                                                                                                                        | 10                                            |
|                                 | MCT+ACTRIIA-Fc 10 mg/kg   | 10                         | 1                                                                                                                                        | 9                                             |
| <b>SU-Hx rat prophylaxis</b>    | Control (normoxia)        | 5                          | 0                                                                                                                                        | 5                                             |
|                                 | SU-Hx+Vehicle             | 10                         | 1                                                                                                                                        | 9                                             |
|                                 | SU-Hx+ACTRIIA-Fc          | 10                         | 0                                                                                                                                        | 10                                            |
|                                 | SU-Hx+Sildenafil          | 10                         | 0                                                                                                                                        | 10                                            |
| <b>SU-Hx rat rescue (3+3)</b>   | Control (normoxia)        | 5                          | 0                                                                                                                                        | 5                                             |
|                                 | SU-Hx+Vehicle             | 8                          | 0                                                                                                                                        | 8                                             |
|                                 | SU-Hx+ACTRIIA-Fc 1 mg/kg  | 7                          | 0                                                                                                                                        | 7                                             |
|                                 | SU-Hx+ACTRIIA-Fc 3 mg/kg  | 7                          | 0                                                                                                                                        | 7                                             |
|                                 | SU-Hx+ACTRIIA-Fc 10 mg/kg | 8                          | 0                                                                                                                                        | 8                                             |
| <b>SU-Hx rat rescue (3+2+4)</b> | Control (normoxia)        | 5                          | 0                                                                                                                                        | 5                                             |
|                                 | SU-Hx+Vehicle             | 5                          | 1                                                                                                                                        | 4                                             |
|                                 | SU-Hx+ACTRIIA-Fc          | 8                          | 0                                                                                                                                        | 8                                             |
|                                 | SU-Hx+Sildenafil          | 7                          | 0                                                                                                                                        | 7                                             |

**Table S3. Antibodies used in the present study.**

| Antibody                             | Supplier       | Catalog number         | Dilution (IHC) | Dilution (ICW) | Dilution (IF) | Dilution (WB) |
|--------------------------------------|----------------|------------------------|----------------|----------------|---------------|---------------|
| p-SMAD1/3/5                          | Abcam          | ab52903                |                |                |               | 1:2000        |
| p-SMAD1/5                            | Cell Signaling | 9516                   |                | 1:400          |               | 1:1000        |
| p-SMAD2                              | Cell Signaling | 8828                   |                | 1:250          |               | 1:1000        |
| p-SMAD2/3                            | Abcam          | ab63399                | 1:100          |                |               |               |
| Total SMAD1                          | Cell Signaling | 6944                   |                |                |               | 1:1000        |
| GAPDH                                | Thermo Fisher  | MA5-15738              |                |                |               | 1:5000        |
| vWF                                  | Dako           | A0082                  |                |                | 1:400         |               |
| smooth muscle $\alpha$ -actin        | Sigma          | A2547                  | 1:100          | 1:200          | 1:100         |               |
| Calponin                             | Abcam          | ab46794                |                | 1:200          |               |               |
| Ki67                                 | Cell Signaling | 9129                   | 1:200          |                |               |               |
| Activin A                            | Thermo Fisher  | PA5-47004              | 10 ug/ml       |                |               | 1:2000        |
| GDF8                                 | R&D            | AF788 (for IHC and WB) | 10 ug/ml       |                |               | 1:2000        |
| GDF11                                | R&D            | AF1958 (for IHC)       | 15 ug/ml       |                |               | 1:2000        |
| GDF11                                | R&D            | MAB19581 (for WB)      |                |                |               | 1:2000        |
| Cleaved caspase-3                    | Cell Signaling | 9664                   |                |                |               | 1:1000        |
| Rabbit anti-goat IgG, HRP            | Thermo Fisher  | 81-1620                | 1:100          |                |               | 1:10,000      |
| Anti-mouse IgG, HRP                  | Cell Signaling | 7076S                  | 1:100          | 1:1000         |               | 1:10,000      |
| Anti-rabbit IgG, HRP                 | Cell Signaling | 7074S                  | 1:100          | 1:1000         |               | 1:10,000      |
| Goat Anti-rabbit IgG Alexa Flour 488 | Abcam          | ab150077               |                |                | 1:100         |               |
| Goat Anti-rabbit IgG Alexa Flour 555 | Abcam          | Ab150078               |                |                | 1:100         |               |

**Table S4. Sequences of primers used in the present study.**

| Species | Gene of interest  | Forward                 | Reverse                |
|---------|-------------------|-------------------------|------------------------|
| Rat     | <i>Pai-1</i>      | CTTTATCCTGGGTCTCCCTG    | TGATGCCTCCCTGACATACA   |
|         | <i>Bmpr2</i>      | AATAATCTGGGTAAAGGCC     | GCAGAACGAACGCAACCTATCA |
|         | <i>Id1</i>        | TGGACGAACAGCAGGTGAACG   | GCACTGATCTCGCCGTT CAGG |
|         | <i>Beta-actin</i> | TGTCACCAACTGGGACGATA    | ACCCTCATAGATGGGCACAG   |
|         |                   |                         |                        |
| Human   | $\alpha$ SMA      | GTGTTGCCCTGAAGAGCAT     | GCTGGGACATTGAAAGTCTCA  |
|         | <i>Caldesmon</i>  | TGGAGGTGAATGCCCAGAAC    | GAAGGCGTTTTTGGCGTCTTT  |
|         | <i>Smoothelin</i> | CCCTGGCATCCAAGCGTTT     | CTCCACATCGTTCATGGACTC  |
|         | <i>Calponin</i>   | CTGTCAGCCGAGGTTAAGAAC   | GAGGCCGTCCATGAAGTTGTT  |
|         | <i>MMP2</i>       | TACAGGATCATTGGCTACACACC | GGTCACATCGCTCCAGACT    |
|         | <i>MMP9</i>       | TGTACCGCTATGGTTACACTCG  | GGCAGGGACAGTTGCTTCT    |
|         | <i>TIMP1</i>      | CTTCTGCAATTCCGACCTCGT   | ACGCTGGTATAAGGTGGTCTG  |
|         | <i>FN1</i>        | CGGTGGCTGTCAGTCAAAG     | AAACCTCGGCTTCCTCCATAA  |
|         | <i>18S</i>        | CGGCTACCACATCCAAGGAA    | GCTGGAATTACCGCGGCT     |
|         | <i>CTGF</i>       | TAGCAAGAGCTGGGTGTGTG    | TTCACTTGCCACAAGCTGTC   |
|         | <i>MSX2</i>       | GGGTCTAAAGCGGAAGTCACT   | GATGGCGACCACTTTCTTGTT  |
|         | <i>VIM</i>        | AGTCCACTGAGTACCGGAGAC   | CATTTCACGCATCTGGCGTTC  |

**Table S5. Donor characteristics of primary tissues used in the study.**

| PH donors     | 227                     | 246               | 256                       | 262                 | L104C                   |
|---------------|-------------------------|-------------------|---------------------------|---------------------|-------------------------|
| Diagnosis     | Group 1.4.4<br>APAH-CHD | Group 1.1<br>IPAH | Group 1.2.1<br>HPAH-BMPR2 | Group 5.2<br>PH-LCH | Group 1.4.4<br>APAH-CHD |
| Cell cultures | PASMC                   | N/A               | PASMC;<br>PMVEC           | PASMC;<br>PMVEC     | PMVEC                   |
| Lung lysates  | Yes                     | Yes               | Yes                       | Yes                 | No                      |
| Age           | 29                      | 66                | 66                        | 45                  | 48                      |
| Gender        | F                       | F                 | M                         | F                   | F                       |
| Smoking       | N                       | N                 | Remote                    | Y                   | N                       |
| BMI           | 20.9                    | 23                | 24.4                      | 18.8                | 21.1                    |
| mean PAP      | 69                      | 48                | 69                        | 74                  | 56                      |
| PVR (WU)      | 7.2                     | 8.8               | 3.66                      | 21.2                | 8.6                     |
| Cardiac Index | 6.19                    | 2.55              | 5.8                       | 1.9                 | 3.3                     |
| FEV1          | 1.7                     | 1.07              | 1.98                      | 1.75                | 2.44                    |
| FEV1 (%)      | 53                      | 45                | 51                        | 56                  | 81                      |
| FVC           | 2.54                    | 2.01              | 3.42                      | 2.65                | 3.55                    |
| FVC (%)       | 69                      | 66                | 68                        | 69                  | 95                      |
| FEV1/FVC      | 0.67                    | 0.53              | 0.58                      | 0.66                | 0.69                    |
| TLC (%)       | 75                      | 111               | 94                        | 77                  | 101                     |
| DLCO (%)      | 61                      | 50                | 56                        | 8                   | 89                      |

| PMVEC control donors | 547317 | 560578 | 677243 |
|----------------------|--------|--------|--------|
| Age                  | 57     | 39     | 7      |
| Gender               | M      | F      | F      |
| Smoking              | N      | N      | N      |

| PASMC control donors | 369143 | 407340 | 559495 | 578443 | 658401 | 669096 |
|----------------------|--------|--------|--------|--------|--------|--------|
| Age                  | 43     | 56     | 64     | 51     | 52     | 51     |
| Gender               | M      | F      | M      | F      | F      | M      |
| Smoking              | N      | N      | Y      | Y      | Y      | N      |

| PAH tissue sections | Diagnosis                  | Label |
|---------------------|----------------------------|-------|
| TB121567            | Unused donor control       | A     |
| Control 1           | Unused donor control       | B     |
| TB121584            | Tumor adjacent normal lung | C     |
| TB121545            | Tumor adjacent normal lung | D     |
| TB121658            | Tumor adjacent normal lung | E     |
| 5401054             | Group 1.1 IPAH             | F     |
| 5031201             | Group 1.1 IPAH             | G     |
| S951786             | Group 1.1 IPAH             | H     |
| S001859             | Group 1.1 IPAH             | I     |
| 095559              | Group 1.1 IPAH             | J     |
| 5971353             | Group 1.2.1 HPAH-BMPR2     | K     |
| 5021254             | Group 1.2.1 HPAH-BMPR2     | L     |
| S03406              | Group 1.2.1 HPAH-BMPR2     | M     |
| S031201             | Group 1.2.1 HPAH-BMPR2     | N     |
| S9850               | Group 1.2.1 HPAH-BMPR2     | O     |
